# Supplementary material
Source: PubMed Central journal article supplement (PMC4060482)
Supplement: EC.00013-14_zek999094260so1.pdf [file EC.00013-14_zek999094260so1.pdf]

A)

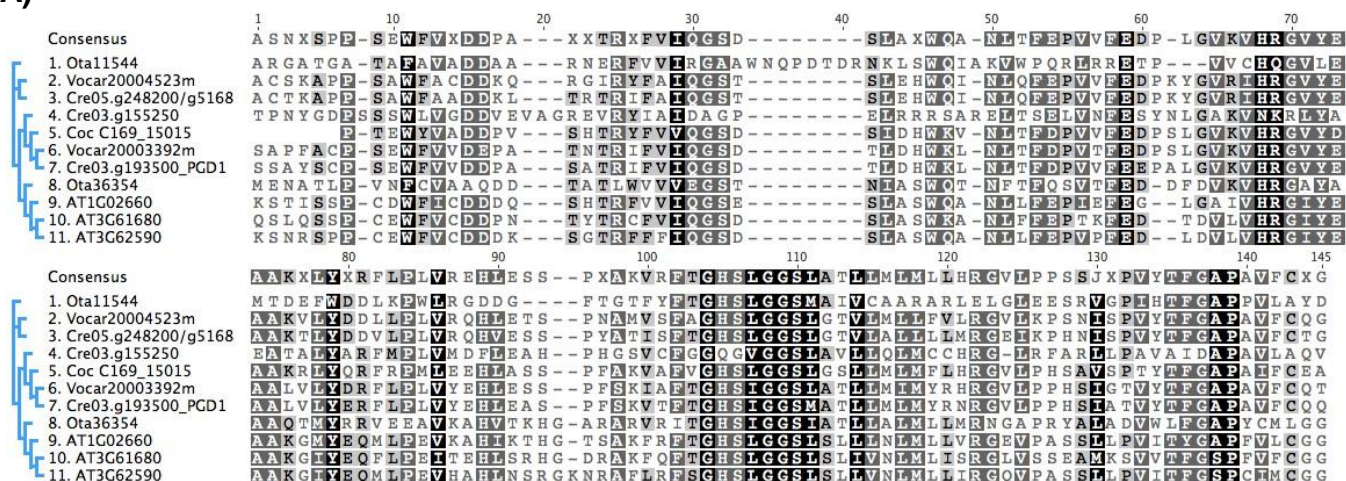

B)

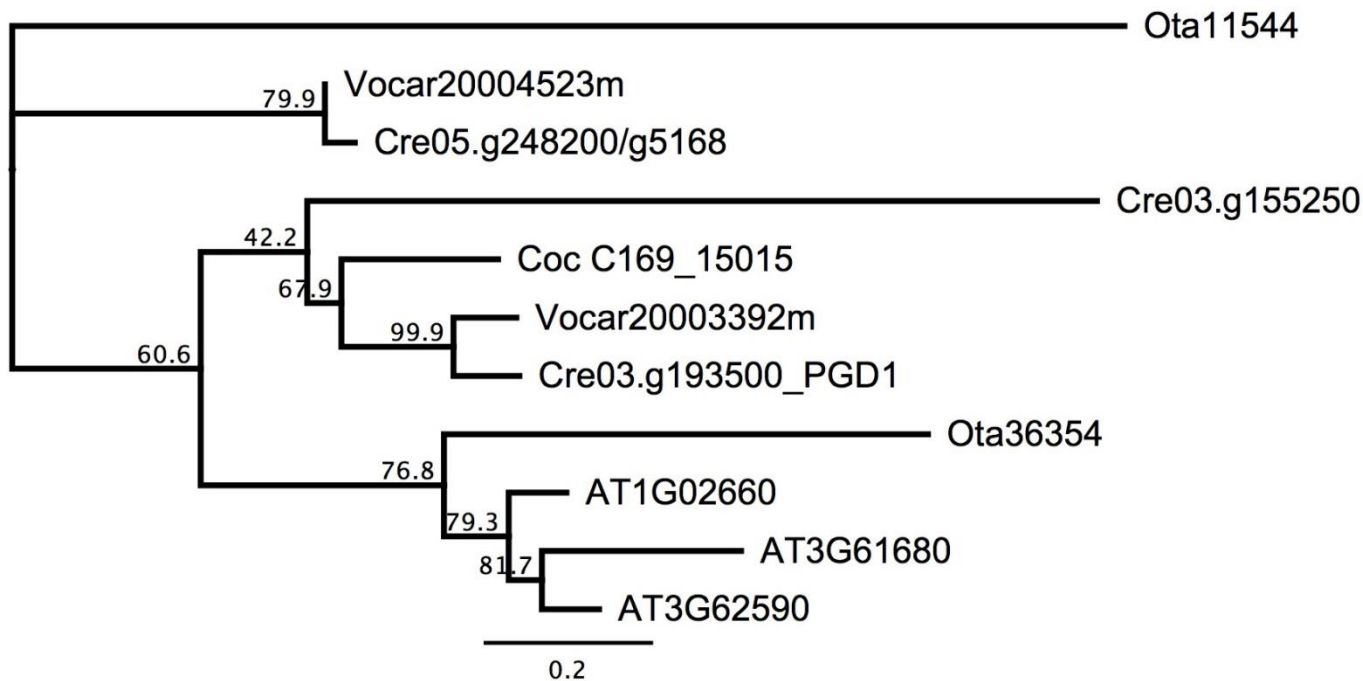

**Figure S1** Phylogeny of *PGD1*-related genes. A) Alignments of N-terminal lipase domains. Shading is based on BLOSUM62 homology matrix. AT, *Arabidopsis thaliana*; Cre, *C. reinhardtii*; Coc, *Coccomixa subellipsoidea* C169; Ota, *Ostreococcus tauri*; Vocar, *Volvox carteri*. In addition to the lipase domain, *PGD1* and Cre05.g248200, but not Cre03.g155250, share a C-terminal homology domain. B) Bayesian tree based on N-terminal lipase domain alignments. Scale bar: gamma-corrected amino acid substitution rate based on WAG matrix per site.

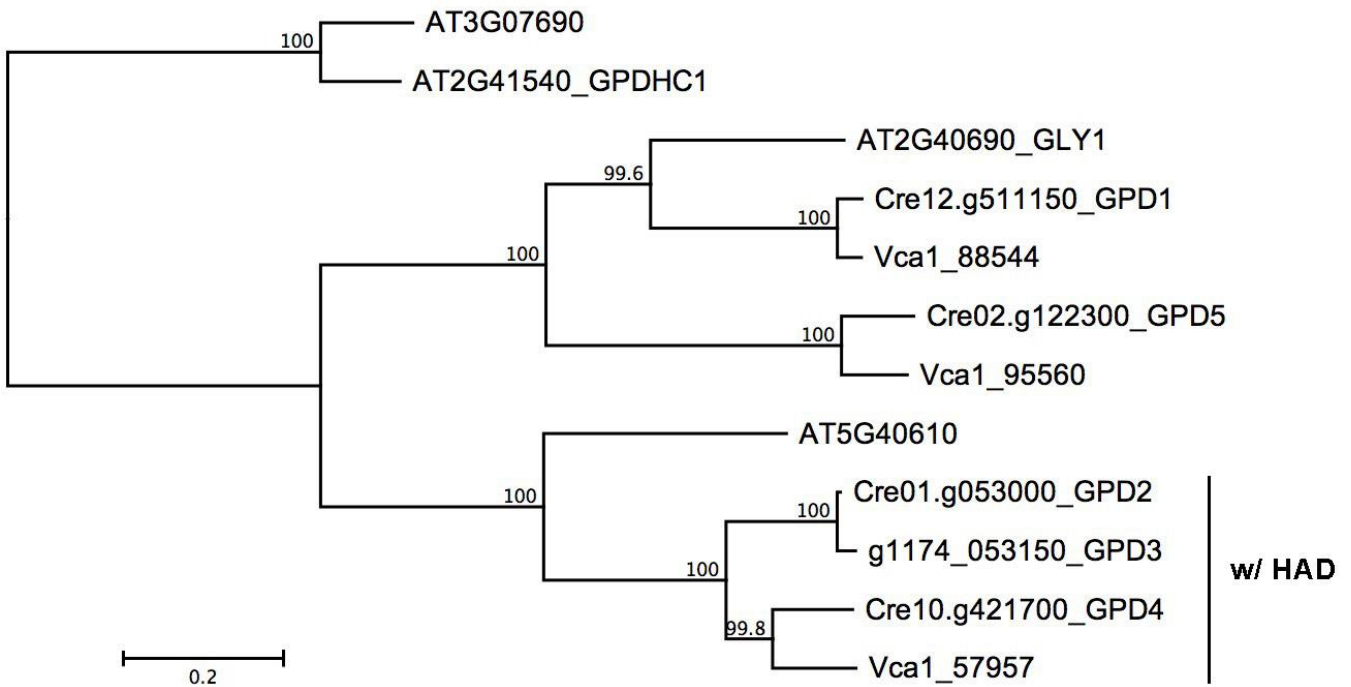

**Figure S2** Neighbor-joining tree of the five glycerol-3-P dehydrogenase (*GPD*) genes in *C. reinhardtii* and their orthologues in *Volvox carteri* (*Vca*) and *Arabidopsis thaliana* (*AT*). HAD: genes including a HAD domain with homology to 3-phosphoserine phosphatase (PSP). Scale bar: Jukes-Cantor distance.

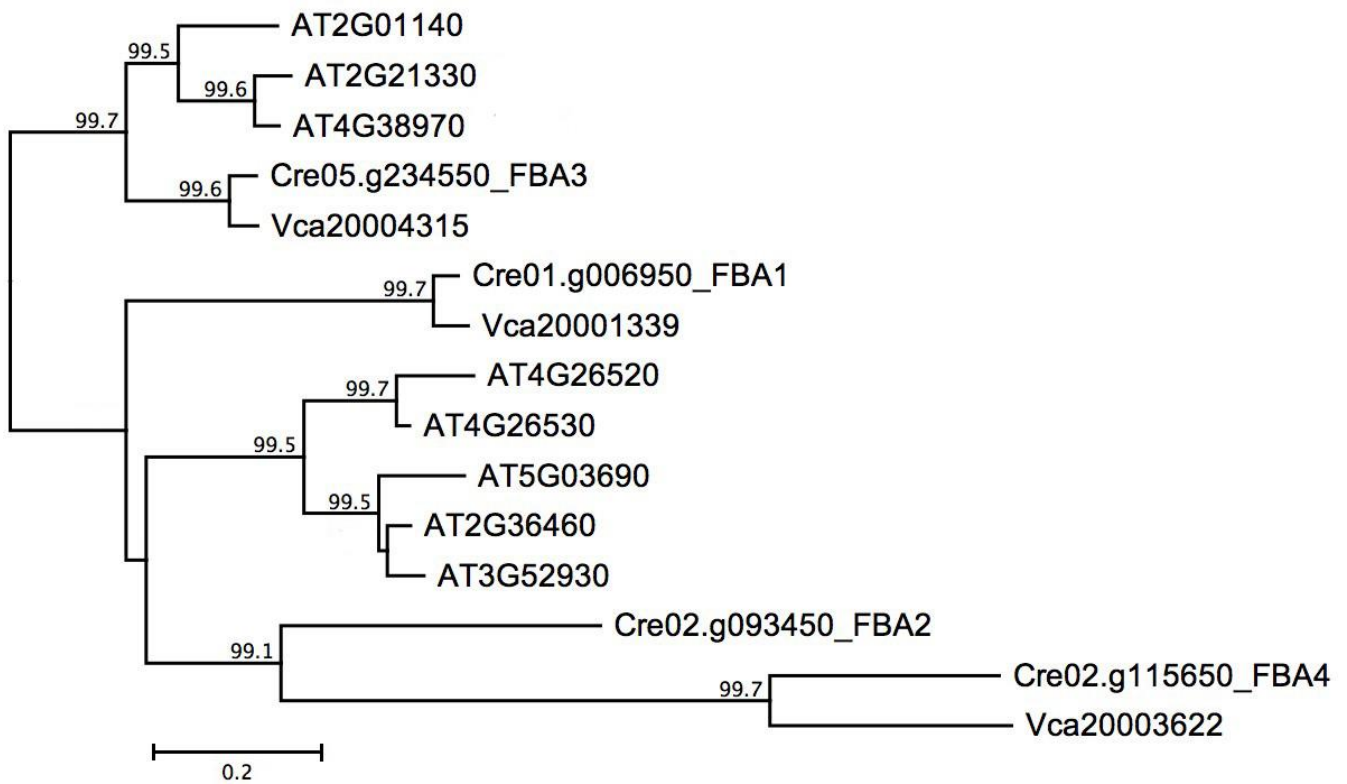

**Figure S3** Bayesian consensus tree of the four fructose-1,6-bisphosphate aldolase (*FBA*) genes from *C. reinhardtii* and their orthologues in *Volvox carteri* (*Vca*) and *Arabidopsis thaliana* (*AT*). Scale bar: gamma-corrected amino acid substitution rate based on WAG matrix per site.

### A. *cw15*

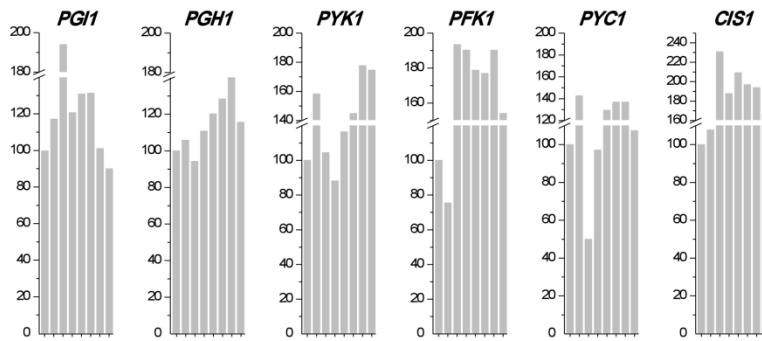

### B. *sta6*

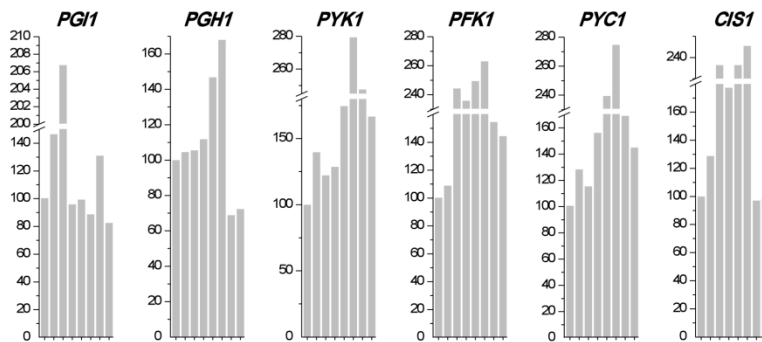

### C. *cw15*

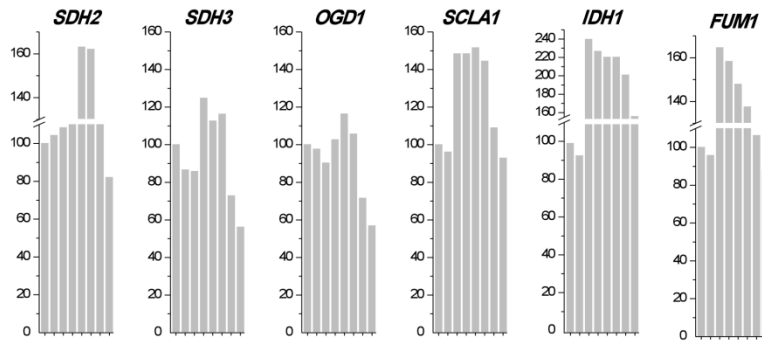

### D. *sta6*

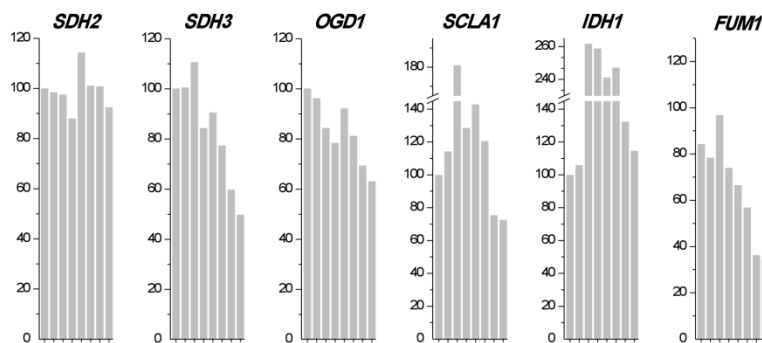

**Figure S4** Expression profiles for genes in the same pathways as the “sensitive” genes displayed in Fig. 5 (see Fig. 5 legend for details).



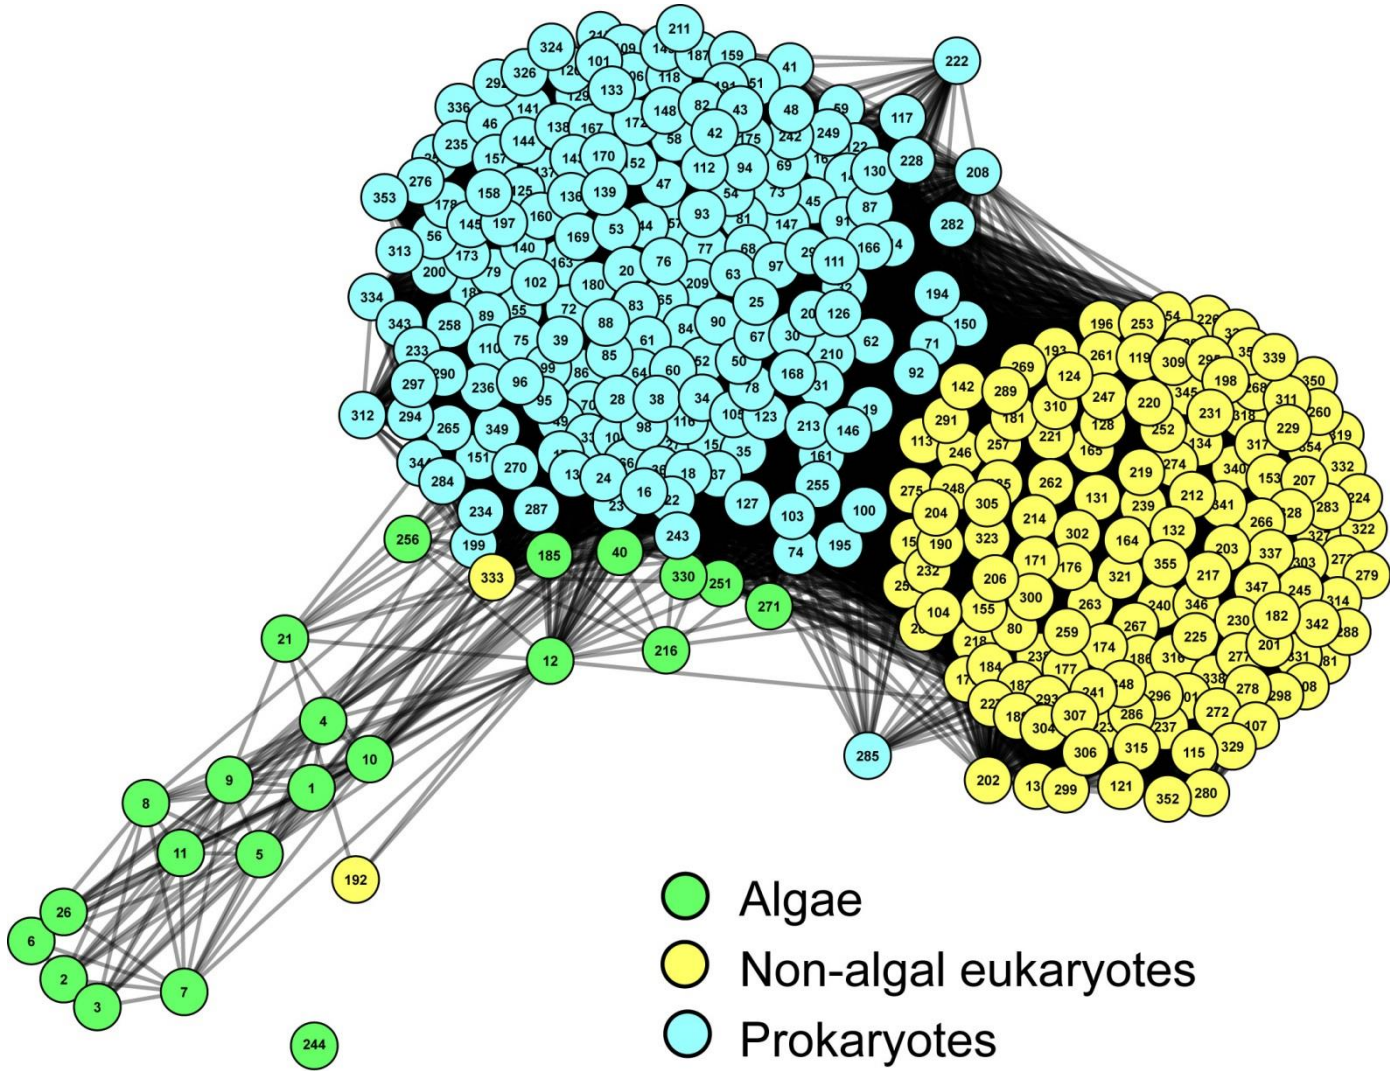

**Figure S5B** Similarity network of genes in the Grp1\_Fun34\_YaaH family (see Dataset 6 for key to numbers and protein sequences).

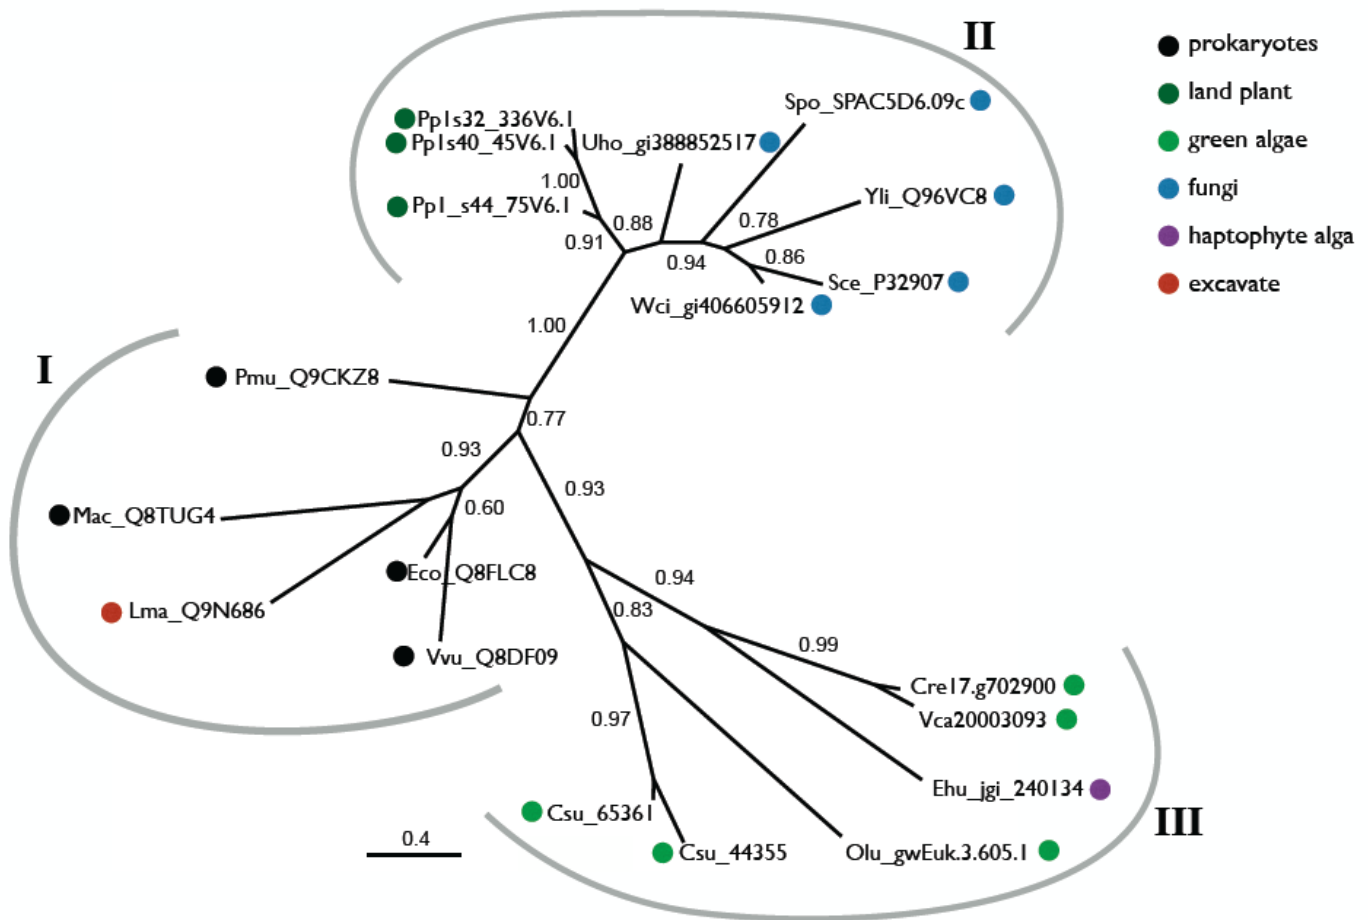

**Figure S5C** Unrooted maximum likelihood phylogeny queried with the pfam01184 domain. Approximate likelihood ratio test (aLRT) supporting values above 0.5 are shown at each branch. Species IDs: Cre, *Chlamydomonas reinhardtii*; Vca, *Volvox carteri*; Ehu, *Emiliania huxleyi*; Olu, *Ostreococcus lucimarinus*; Csus, *Coccomyxa subellipsoidea*; Vvu, *Vibrio vulnificus*; Eco, *Escherichia coli*; Lma, *Leishmania major*; Mac, *Methanosarcina acetivorans*; Pmu, *Pasteurella multocida*; Pp, *Physcomitrella patens*; Uho, *Ustilago hordei*; Spo, *Schizosaccharomyces pombe*; Yli, *Yarrowia lipolytica*; Sce, *Saccharomyces cerevisiae*; Wci, *Wickerhamomyces ciferrii*.

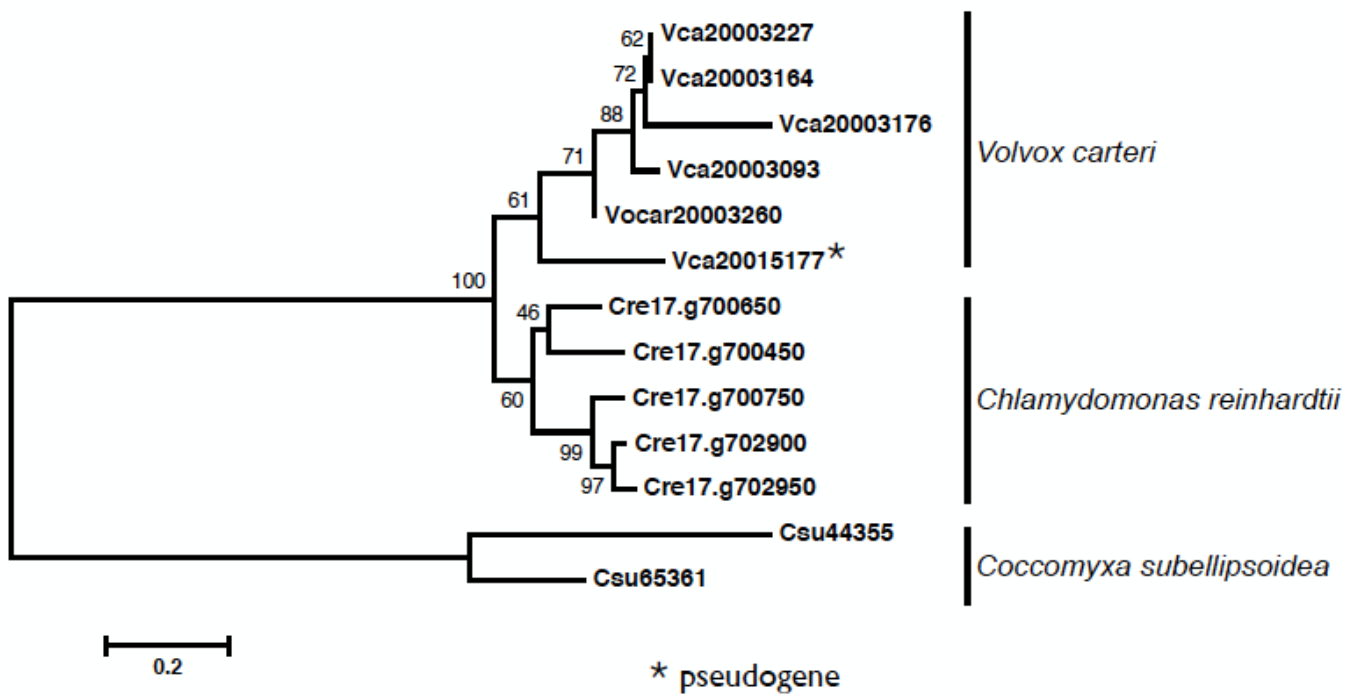

**Figure S5D** Neighbor-joining tree with bootstrap values from 500 replicates of Chlorophycean GPR1\_FUN30\_YaaH family members.
